# Supplementary material for: Thrombospondin Type-1 Repeat Domain-Containing Proteins Are Strongly Expressed in the Head Region of Hydra
Source: PubMed Central journal article supplement (PMC4820225; doi:10.1371/journal.pone.0151823), 2016-04-04

### A group

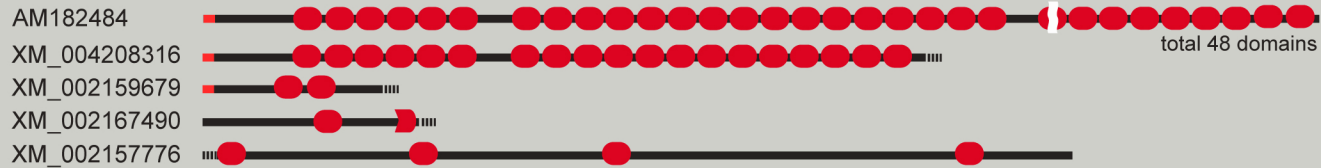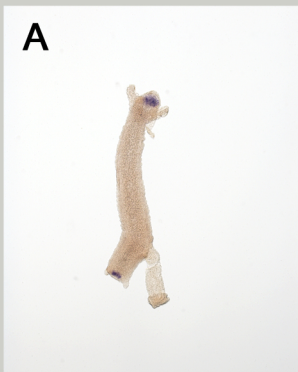

AM182484

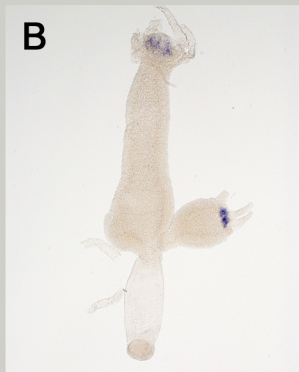

XM\_004208316

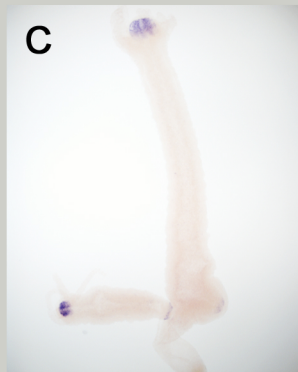

XM\_002159679

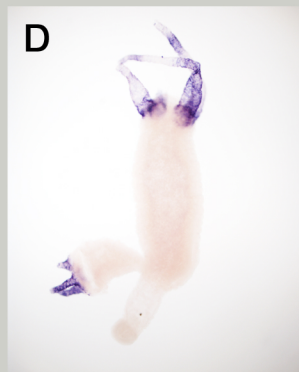

XM\_002167490

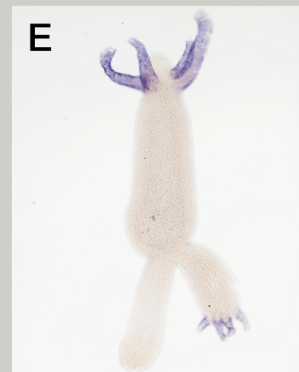

XM\_002157776

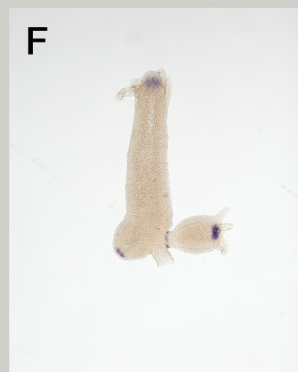

XM\_002170479

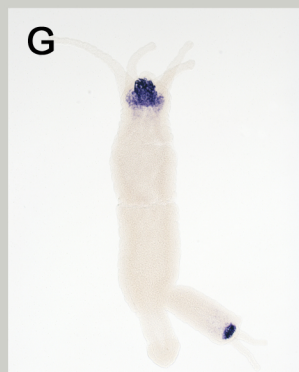

XM\_004205753

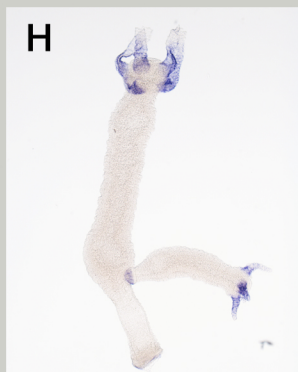

XM\_002154766

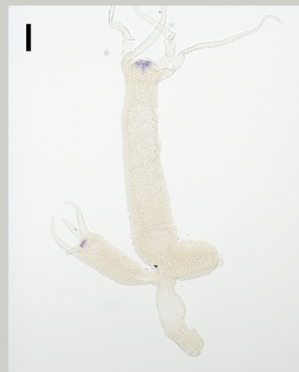

XM\_002162157

### D group

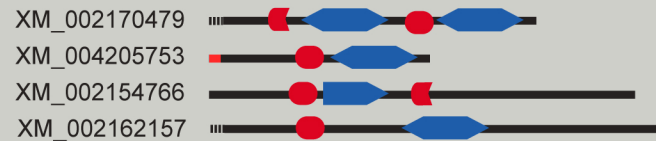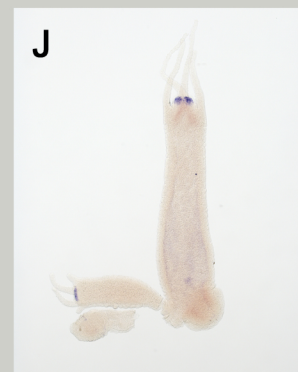

XM\_002168659

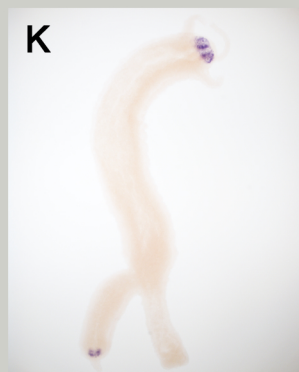

XM\_002157460

### E group

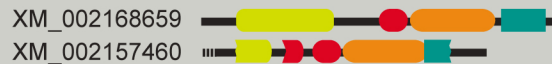

Supplement: pone.0151823.s001.pdf [file pone.0151823.s001.pdf]
